# Supplementary material
Source: Springer Nature journal article supplement (https://www.springermedizin.de/resource/supplementary/12974_2010_326_MOESM1_ESM.pdf/9601434)

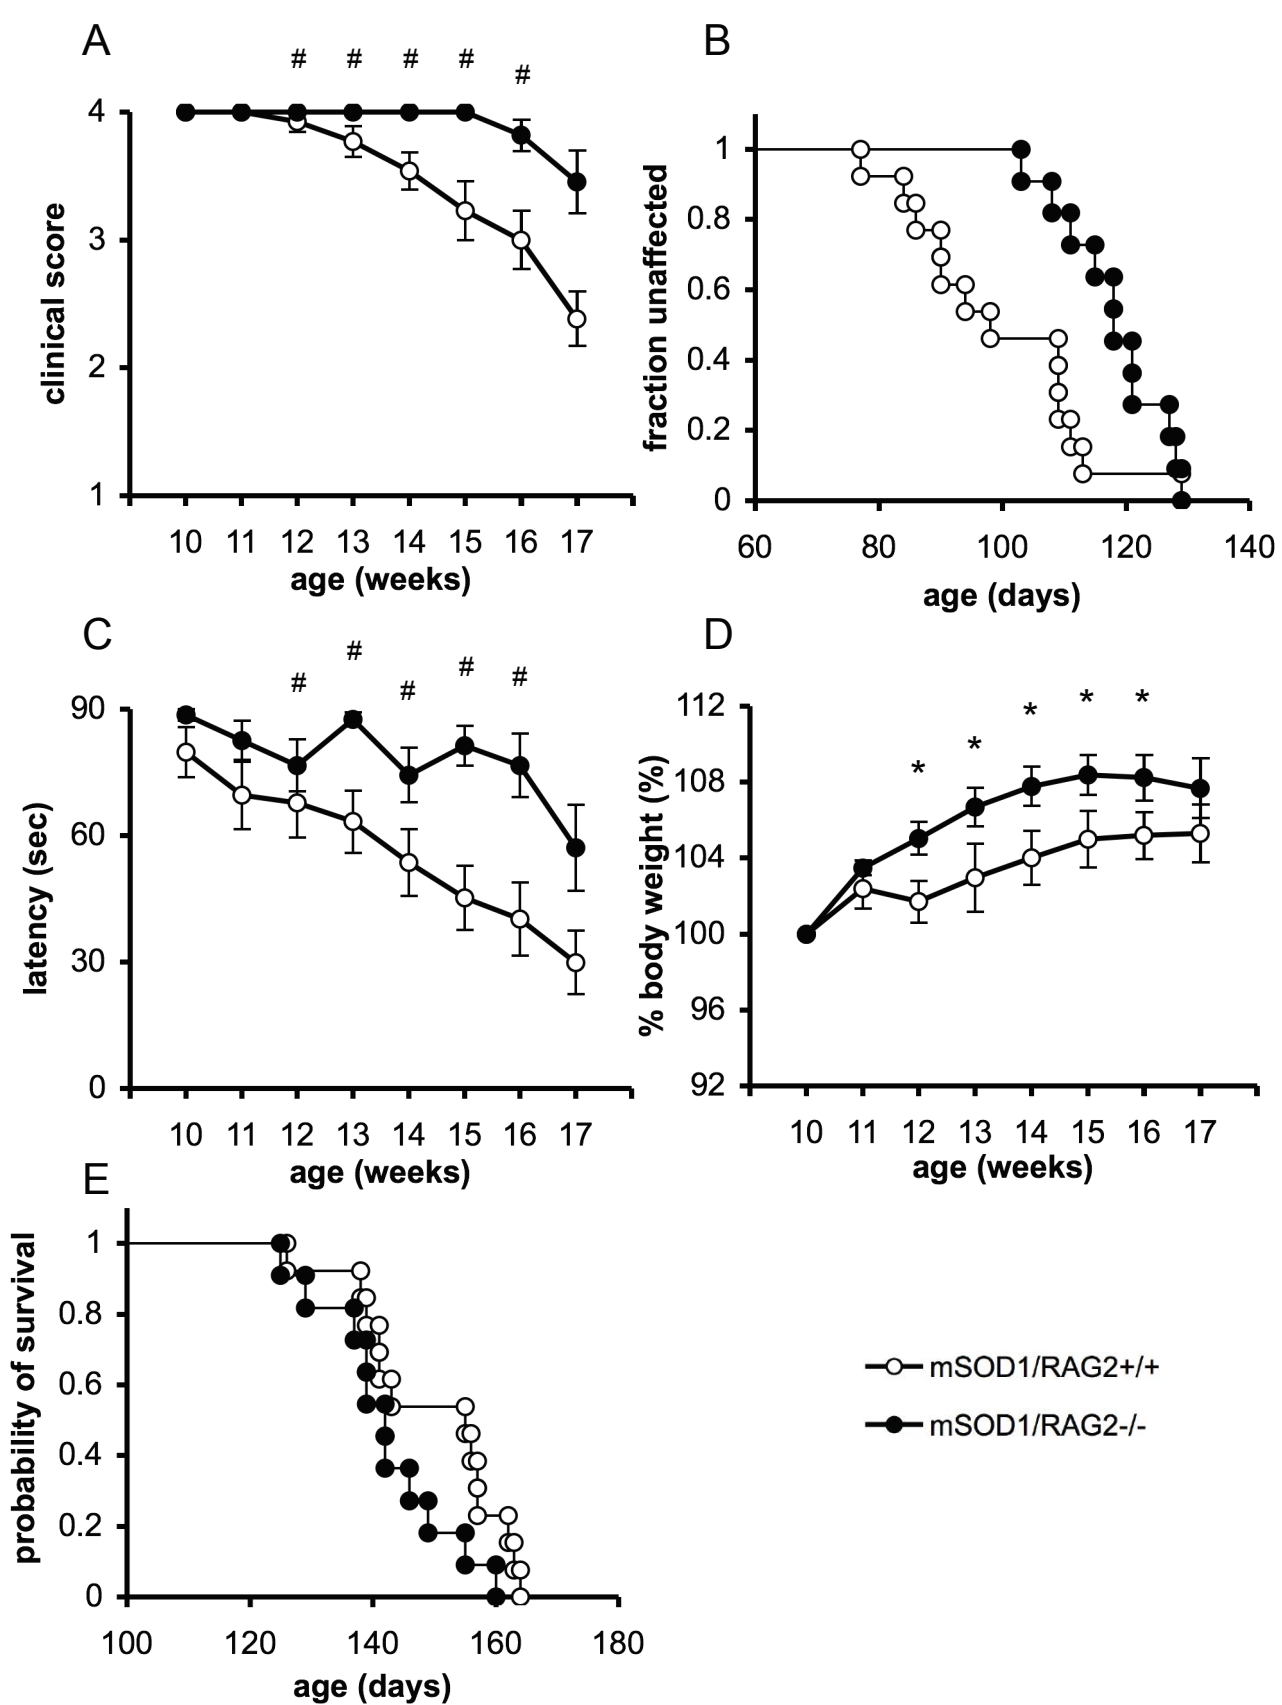

Supplement: MOESM1 [file 9601434]
